# Supplementary material for: Long-term outcomes with nivolumab plus ipilimumab versus sunitinib in first-line treatment of patients with advanced sarcomatoid renal cell carcinoma
Source: HighWire-hosted journal article supplement (doi:10.1136/jitc-2022-005445), 2022-12-01
Supplement: jitc-2022-005445supp002_data_supplement.pdf [file jitc-2022-005445supp002_data_supplement.pdf]

**Figure S2.** Duration of therapy, response, and treatment-free interval, in all sRCC patients with confirmed response (A, complete responders; B, partial responders).

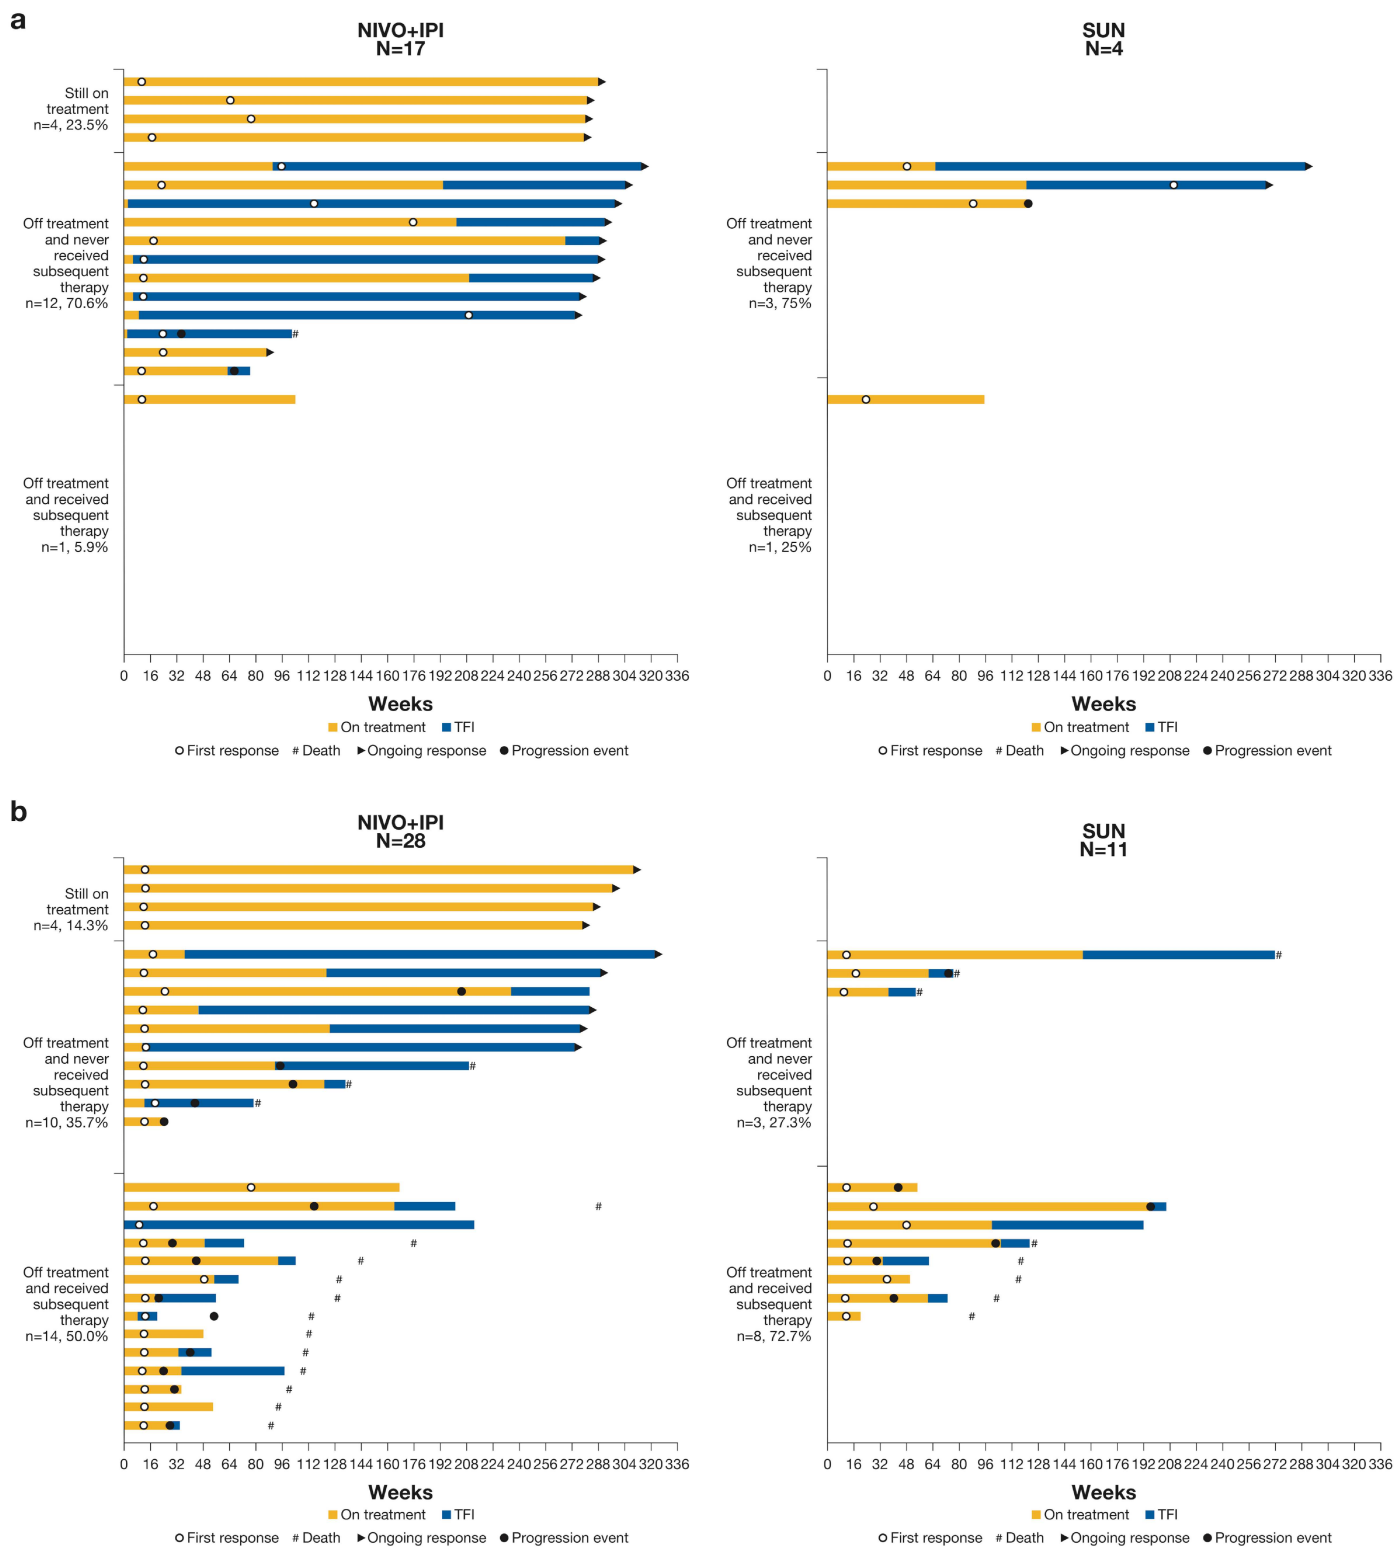

Bar indicates time on treatment/TFI.

NIVO+IPI, nivolumab plus ipilimumab; SUN, sunitinib; TFI, treatment-free interval.
